# Supplementary material for: Learning of distant state predictions by the orbitofrontal cortex in humans
Source: PubMed Central journal article supplement (PMC6560030; doi:10.1038/s41467-019-10597-z), 2019-06-11
Supplement: 41467_2019_10597_MOESM1_ESM.pdf [file 41467_2019_10597_MOESM1_ESM.pdf]

## **Supplementary Information**

### **Learning of distant state predictions by the orbitofrontal cortex in humans**

G. Elliott Wimmer and Christian Büchel

## Supplementary Figures and Supplementary Tables

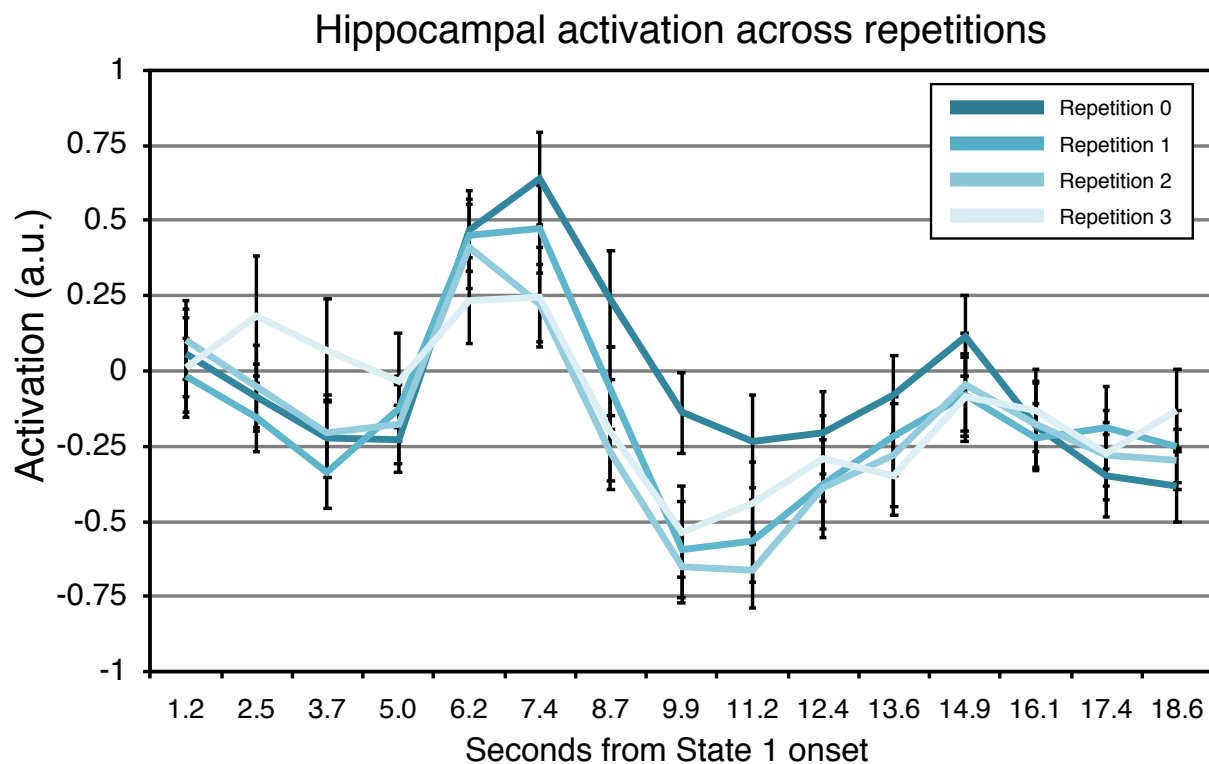

**Supplementary Figure 1.** Timecourse of hippocampal activity at state 1 illustrating a decrease across learning repetitions, as shown the whole-brain univariate analysis in **Figure 2**. Sequence onset is at time 0; expected peak of BOLD response to state 1 is between 6.2 – 8.7 s. (Repetition 0 in darkest aqua; repetition 3 in lightest aqua; error bars represent SEM.)

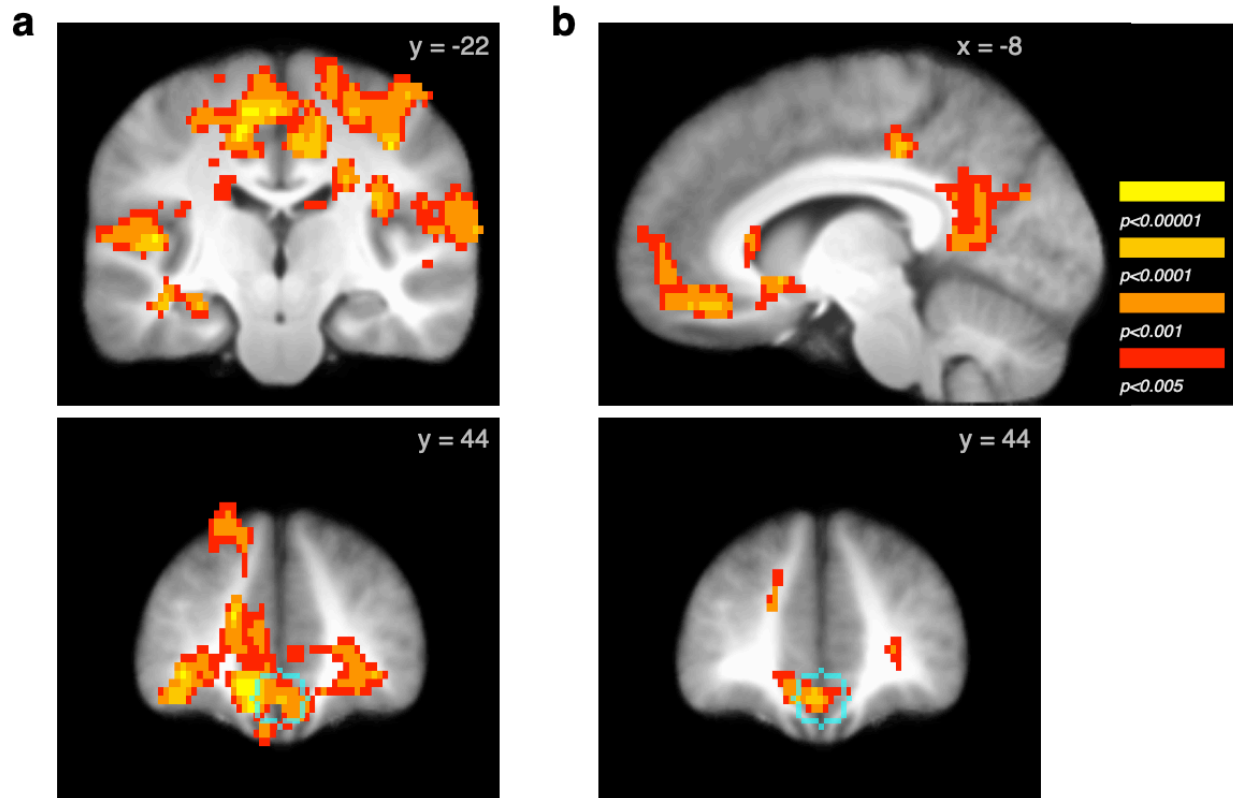

**Supplementary Figure 2.** Reward-related univariate responses at feedback and during post-feedback rest, related to the univariate analysis presented in **Figure 2**. (a) Reward versus loss feedback at the reward stage, including left hippocampus (top), and overlaid with the OFC-VMPFC ROI (bottom) (b) Reward versus loss feedback during the post-feedback rest period, including overlap with the OFC-VMPFC ROI in cyan (bottom). (Images  $p < 0.05$  whole-brain FWE-corrected.) Full maps available at:

<https://neurovault.org/images/100619/> and <https://neurovault.org/images/100620/>

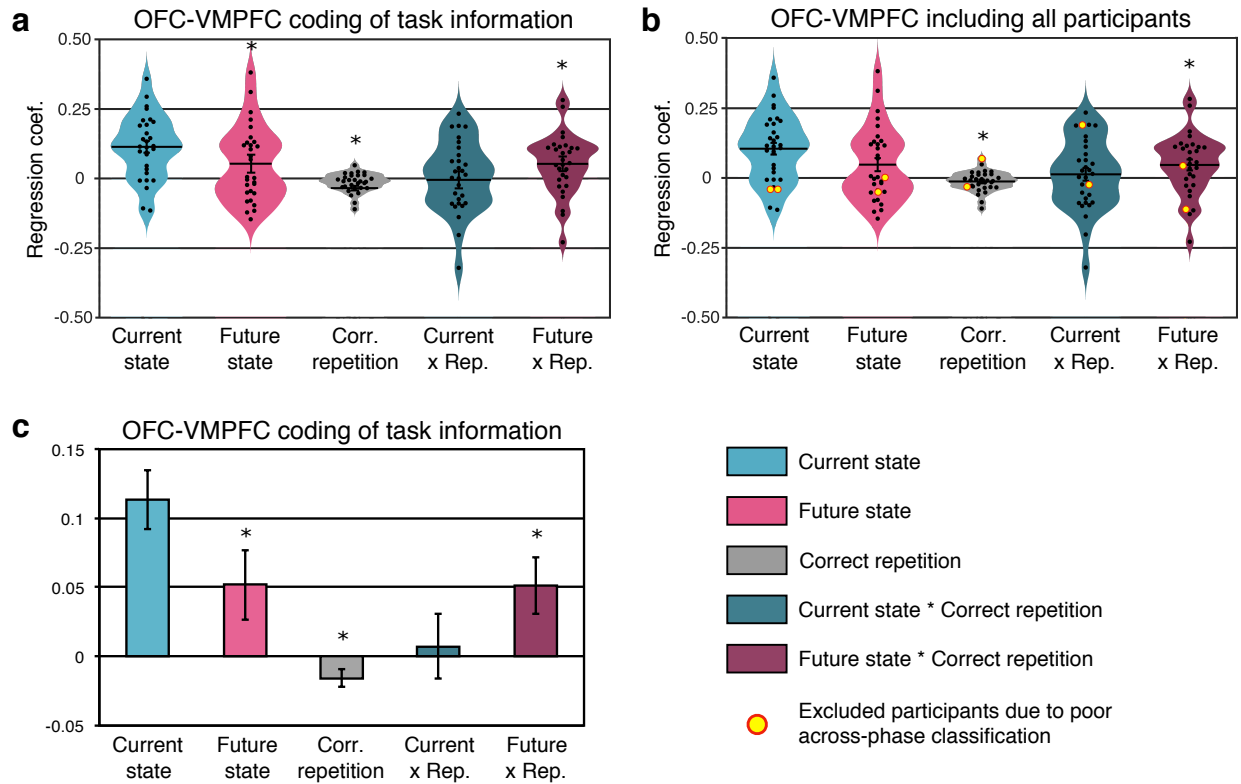

**Supplementary Figure 3.** OFC-VMPFC coding of task information including all participants. (a) OFC-VMPFC coding of task information as shown in **Figure 3b** for comparison. (b) OFC-VMPFC coding of task information including the 2 participants that were excluded from the primary analysis because of below-zero discrimination of actual state 1 and state 3 on-screen categories (individual datapoints marked in yellow). (c) OFC-VMPFC effects as in (a) shown in a standard column chart format instead of a violin plot. (Error bars represent SEM.)

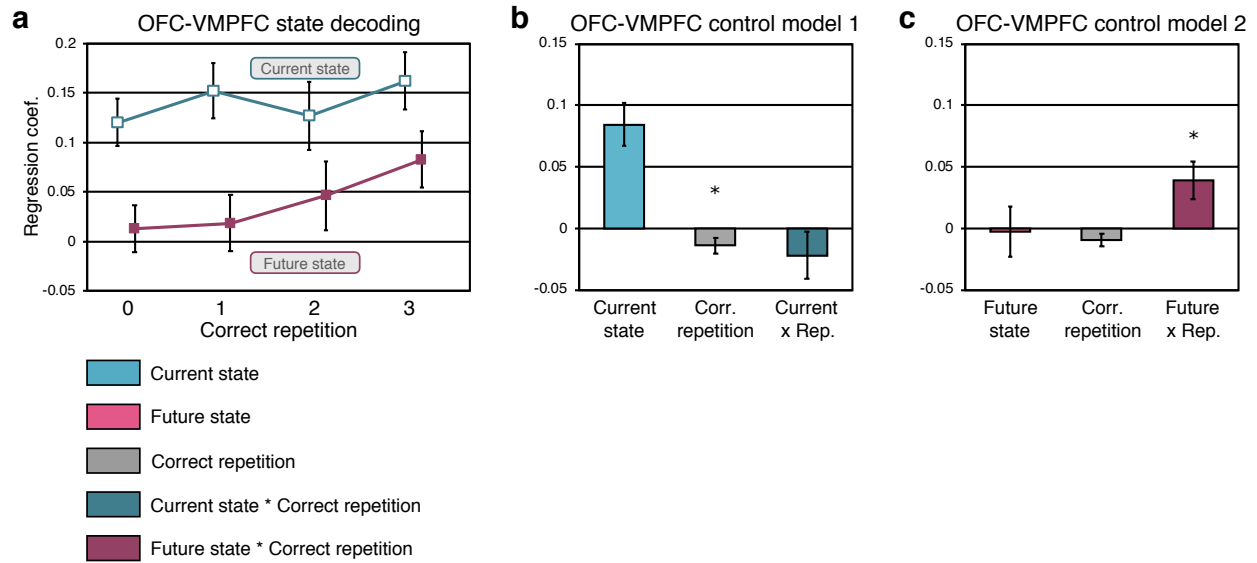

**Supplementary Figure 4.** State representation in the OFC-VMPFC across repetitions and control regression models. (a) Effects of current and future state modeled separately for each bin of correct repetition, as in **Figure 3c**. Current state in aqua; future state in magenta. (b) Information representing current state, correct repetition, and interaction of current state and correct repetition in a control model omitting future state. Note that effects are similar to the full model shown in Figure 3b. (c) Information representing future state, correct repetition, and the critical interaction of future state and correct repetition in a control model omitting current state. (\*  $p < 0.05$ ; \*\*  $p < 0.01$ ; \*\*\*  $p < 0.001$ ; error bars represent SEM.)

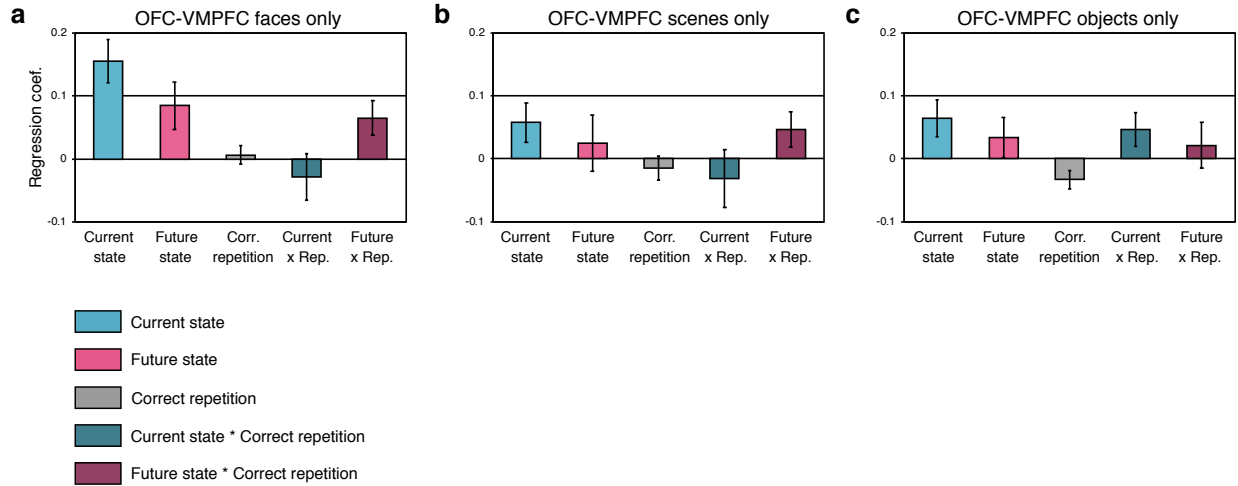

**Supplementary Figure 5.** Current and future state representation at state 1 in the OFC-VMPFC, as in **Figure 3b**, plotted separately for the 3 stimulus categories. (a) Information coding for face stimuli only. (b) Information coding for scene decoding only. (c) Information coding for object stimuli only. Current state in aqua; future state in magenta. (Error bars represent SEM.)

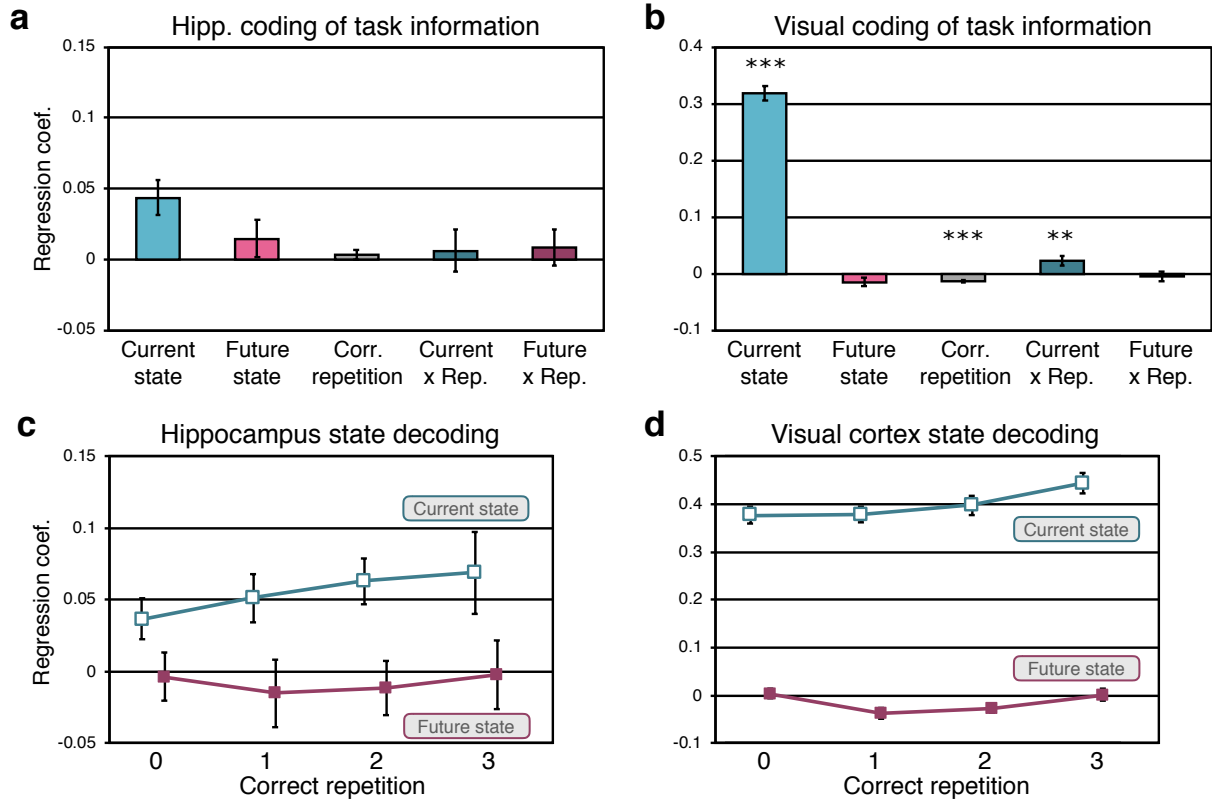

**Supplementary Figure 6.** Current and future state representation at state 1 in the hippocampus (a) and in visual control regions (b), as in **Figure 3b**. (c) Results from an analysis conducted separately for each correct repetition bin for illustration in the hippocampus. Current state in aqua; future state in magenta. (d) As in (c) for the visual cortex. (\*  $p < 0.05$ ; \*\*  $p < 0.01$ ; \*\*\*  $p < 0.001$ ; statistical comparisons for the hippocampus were not completed on the current state representation because the plotted data represents results after exclusion of participants with poor current state decoding. Error bars represent SEM.)

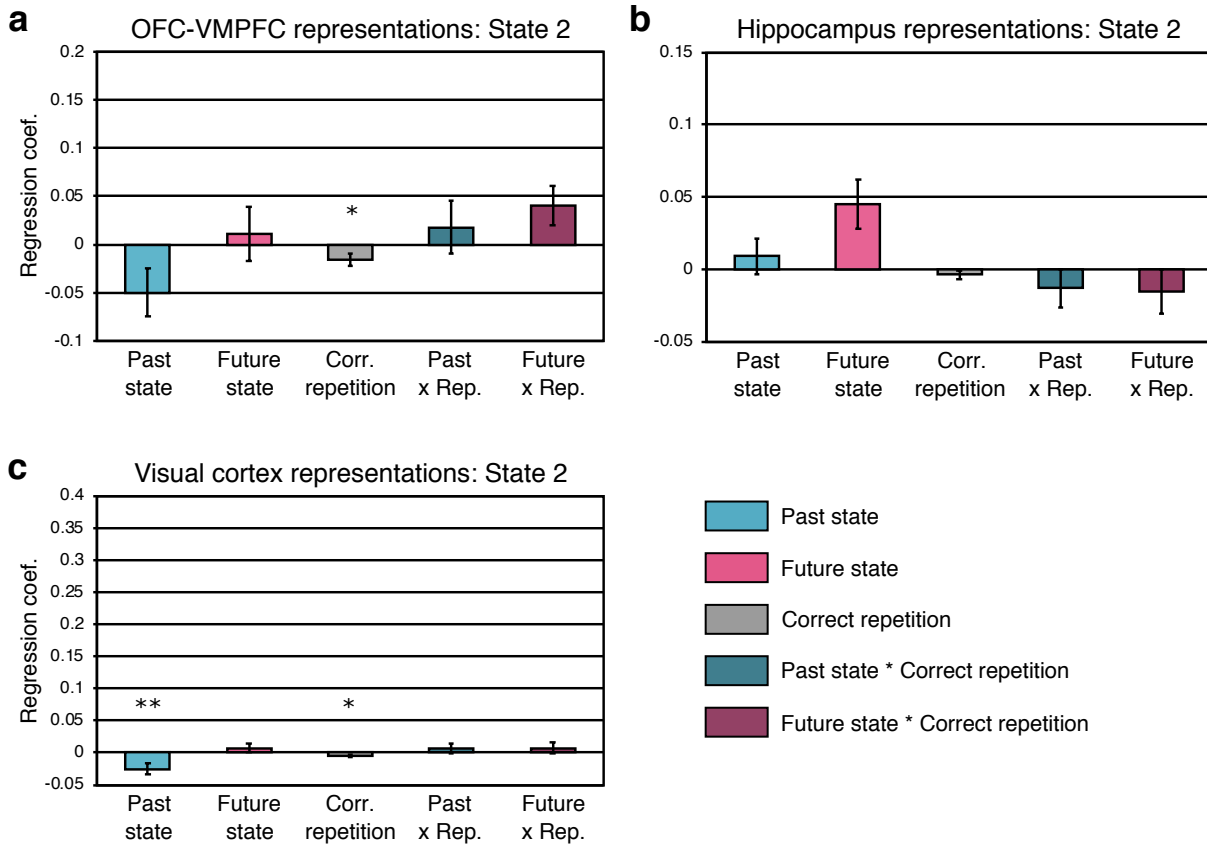

**Supplementary Figure 7.** State representation at state 2 in the OFC-VMPFC (a), hippocampus (b), and visual control regions (c). Note that the future by correct repetition effect in the OFC-VMPFC was positive ( $p = 0.062$ ), similar to the effect at state 1. (\*  $p < 0.05$ ; \*\*  $p < 0.01$ ; \*\*\*  $p < 0.001$ ; error bars represent SEM.)



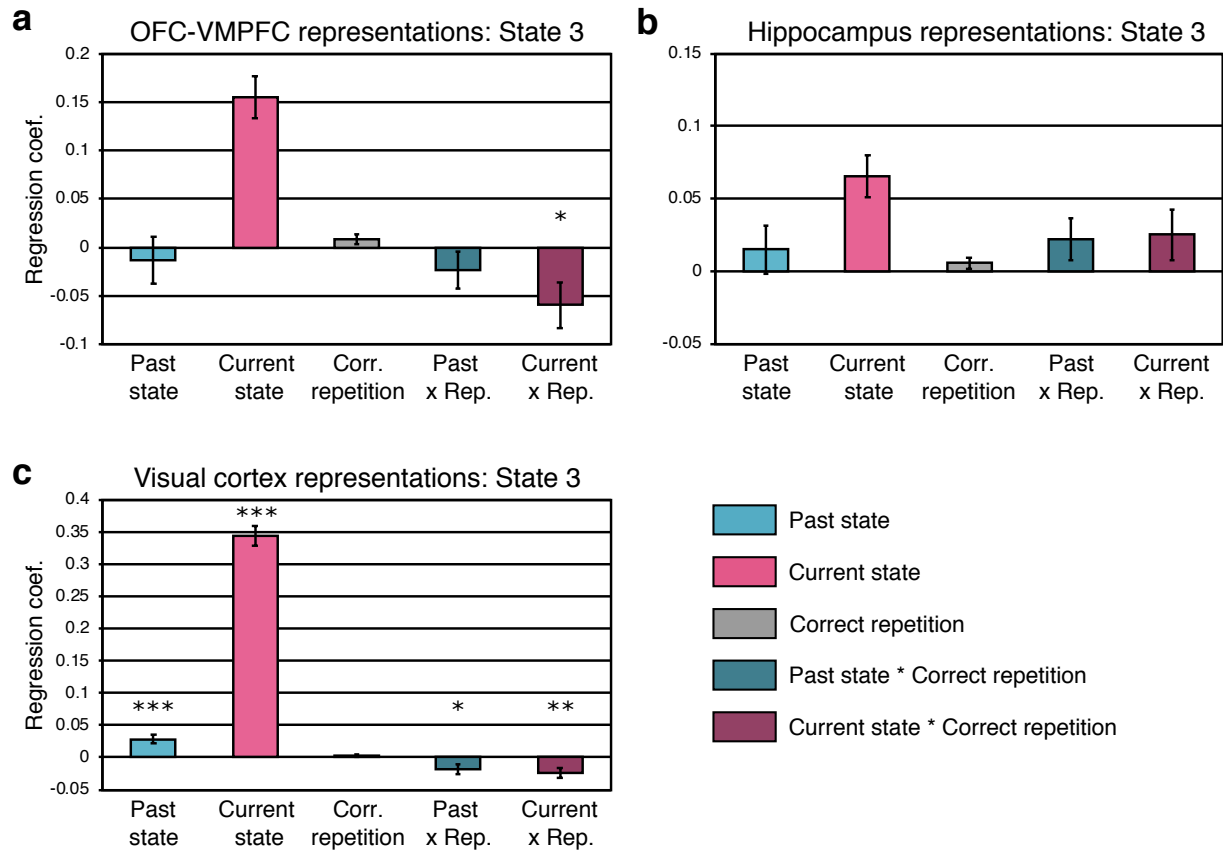

**Supplementary Figure 8.** State representation at state 3 in the OFC-VMPFC (a), hippocampus (b), and visual control regions (c). (\*  $p < 0.05$ ; \*\*  $p < 0.01$ ; \*\*\*  $p < 0.001$ ; statistical comparisons for OFC-VMPFC and hippocampus were not completed on the current state representation because the plotted data represents results after exclusion of participants with poor current state decoding; error bars represent SEM.)

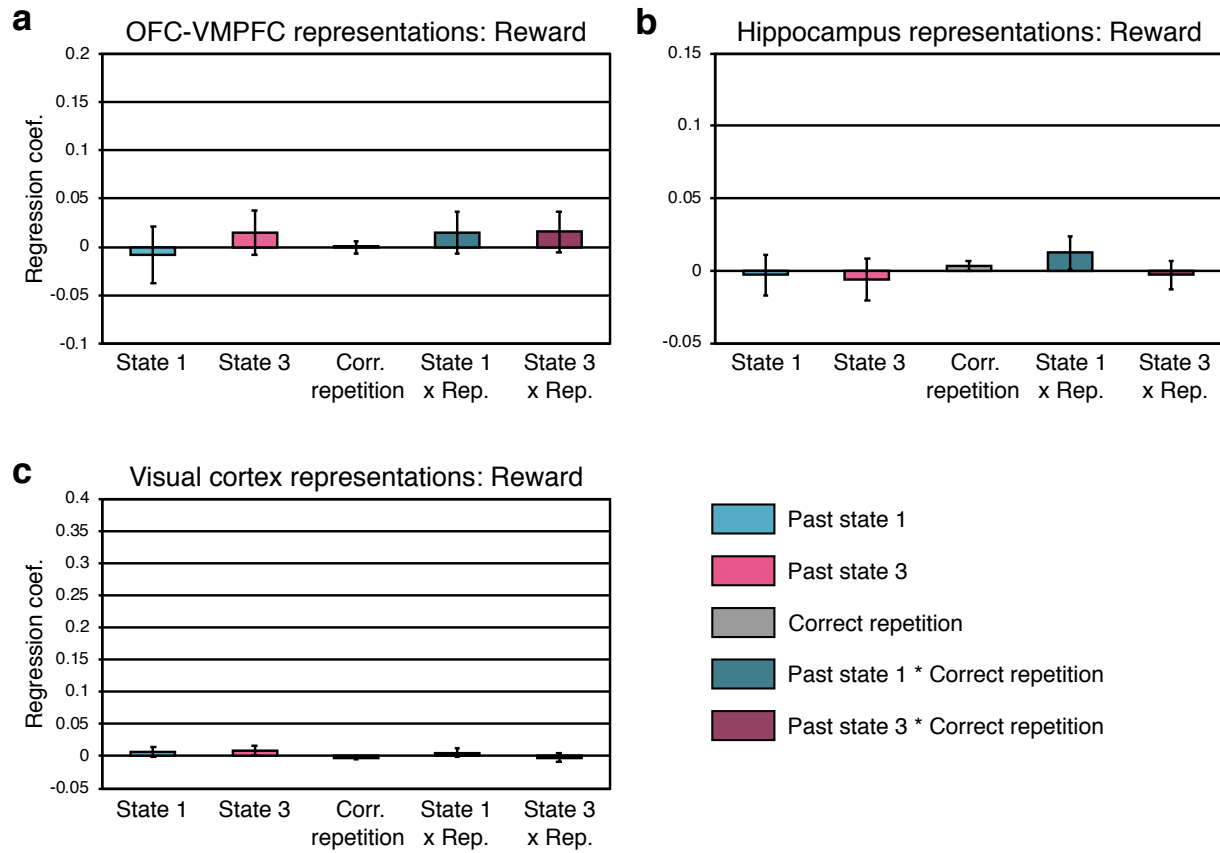

**Supplementary Figure 9.** State representation at the feedback state in the OFC-VMPFC (a), hippocampus (b), and visual control regions (c). (\*  $p < 0.05$ ; \*\*  $p < 0.01$ ; \*\*\*  $p < 0.001$ ; error bars represent SEM.)

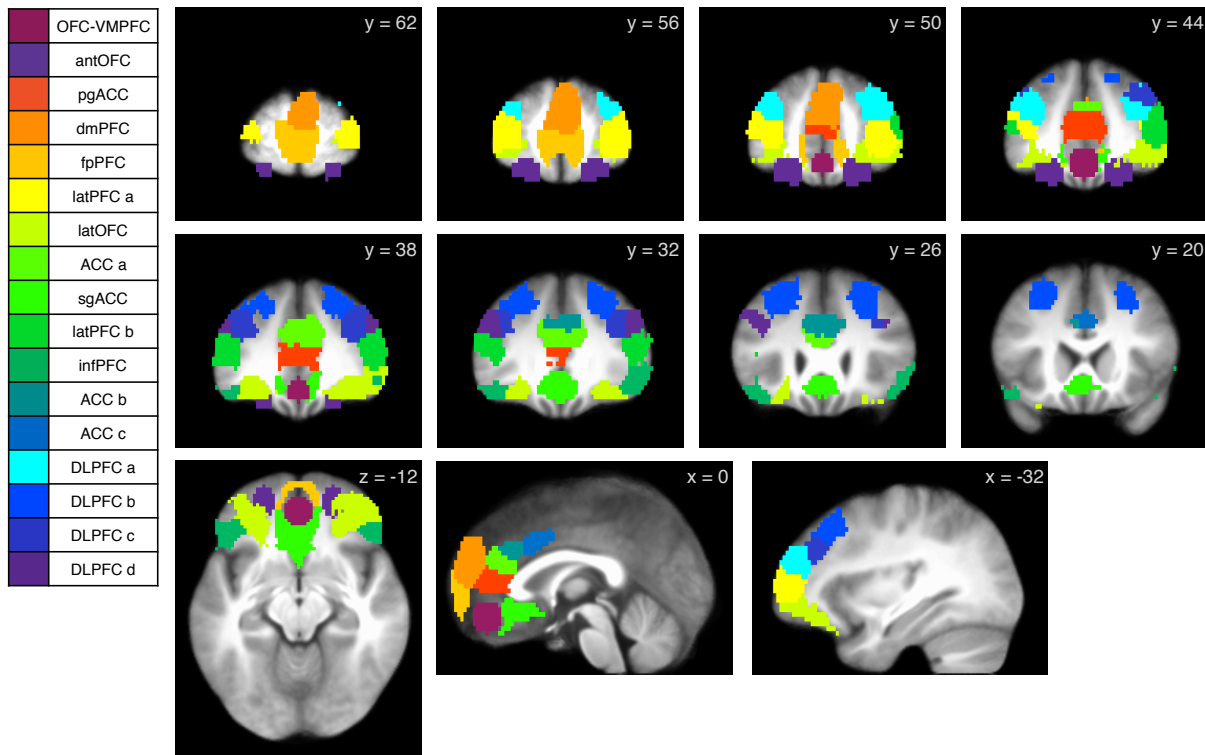

**Supplementary Figure 10.** Regions of interest for additional testing of task information coding in the prefrontal cortex. Regions outside of the OFC-VMPFC and anterior OFC were derived from a functional coactivation map created from Neurosynth (Chang et al., 2018). Results are shown in Table S2. Abbreviations: anterior OFC (antOFC), perigenual anterior cingulate (pgACC), dorsomedial PFC (dmPFC), frontopolar PFC (fpPFC), lateral PFC (latPFC parts a and b), lateral OFC (latOFC), ACC (ACC parts a, b, and c), subgenual ACC (sgACC), inferior PFC (infPFC), dorsolateral PFC (dIPFC parts a, b, c, and d). Full mask available at: <https://neurovault.org/images/122507/>

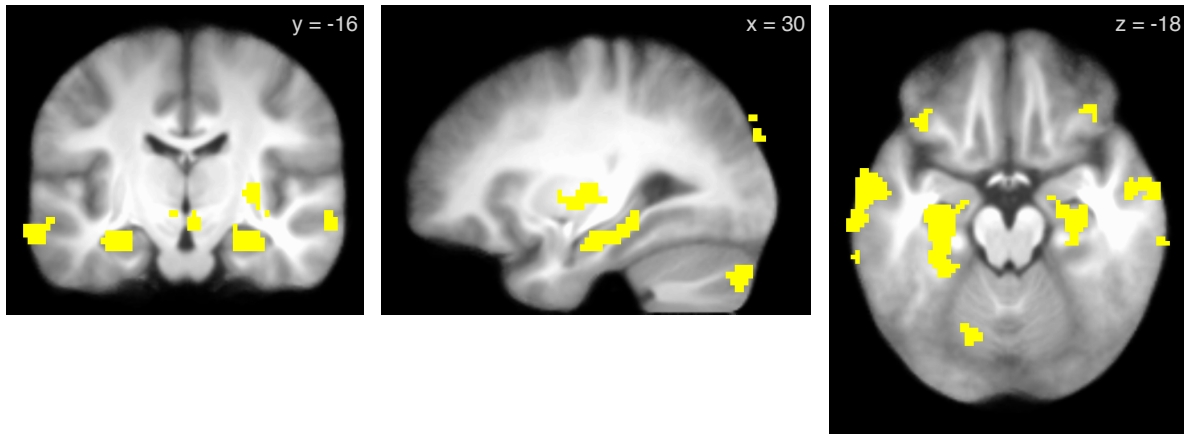

**Supplementary Figure 11.** Connectivity (PPI) between the OFC-VMPFC and the hippocampus: conjunction of effects at state 1, feedback state, and post-feedback rest (individual maps thresholded at  $p < 0.0001$  unc.). Full maps available at: <https://neurovault.org/images/123490/>, <https://neurovault.org/images/123491/>, <https://neurovault.org/images/123492/>

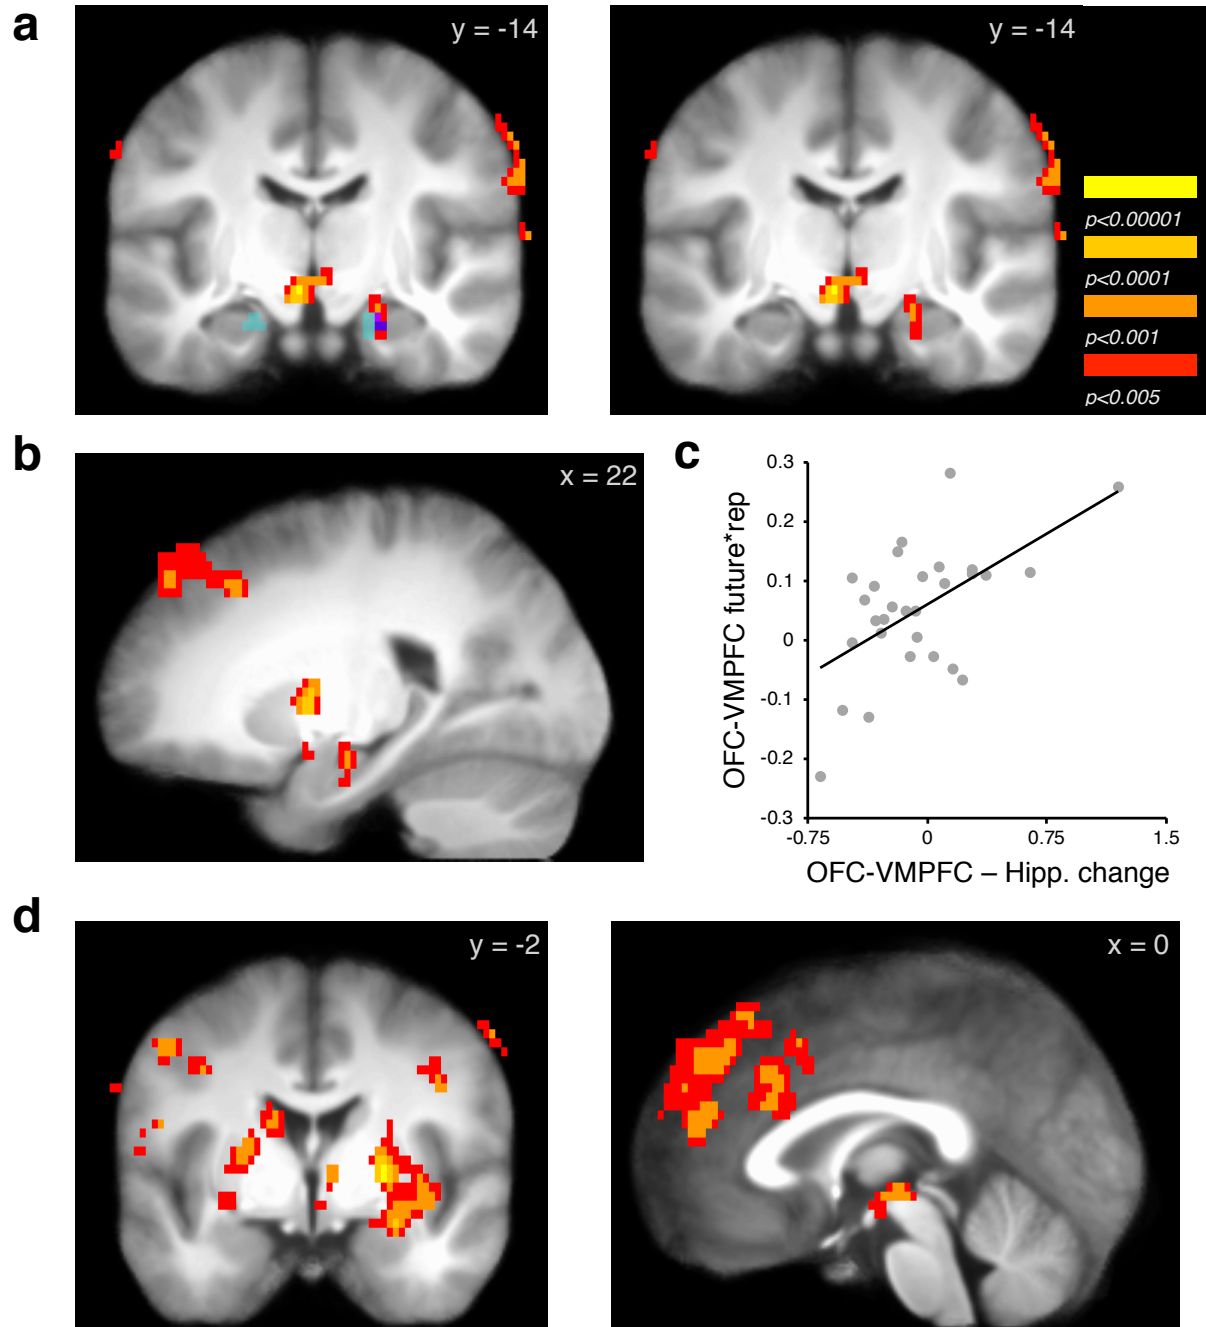

**Supplementary Figure 12.** Connectivity between the OFC-VMPFC and other regions for late versus early repetitions in successfully learned sequences that correlated with individual differences in the OFC-VMPFC future state by repetition effect. (a) A cluster including the hippocampus, midbrain, and thalamus ( $p < 0.05$  whole-brain FWE). Blue and purple represent overlap with decay effects in hippocampus as in Figure 2 ( $p < 0.005$ ;

non-overlapping voxels in cyan). (b) Hippocampal cluster in a sagittal view. (c) Illustration of OFC-VMPFC – hippocampal correlation with OFC-VMPFC future state by repetition effect. (d) Additional clusters included the putamen as well as the dorsal medial and dorsal lateral PFC. (Images  $p < 0.05$  whole-brain FWE-corrected.) Full map available at: <https://neurovault.org/images/123494/>

**Supplementary Table 1.** Summary of univariate analysis results. Clusters of activity exceeding whole-brain  $p < 0.05$  FWE-corrected (cluster-forming threshold  $p < 0.005$ ). Within each cluster, the first 10 regions are listed that include  $\geq 10$  voxels in a cluster. For the reward versus non-reward contrast at feedback, the cluster-forming threshold was set to  $p < 0.0005$  to allow for informative clusters.

| Contrast                   | Regions                                                                                                                                                                                                                                   | Cluster size | x    | y    | z   | Peak z stat |      |      |     |    |   |
|----------------------------|-------------------------------------------------------------------------------------------------------------------------------------------------------------------------------------------------------------------------------------------|--------------|------|------|-----|-------------|------|------|-----|----|---|
| Decay (State 1)            | L Superior Frontal Gyrus                                                                                                                                                                                                                  | 454          | -30  | 26   | 54  | 3.78        |      |      |     |    |   |
|                            | R Middle Occipital Gyrus                                                                                                                                                                                                                  | 450          | 18   | -100 | 18  | 4.1         |      |      |     |    |   |
|                            | R Middle Temporal Gyrus                                                                                                                                                                                                                   |              |      |      |     |             |      |      |     |    |   |
|                            | R Superior Occipital Gyrus                                                                                                                                                                                                                |              |      |      |     |             |      |      |     |    |   |
|                            | R Lingual Gyrus                                                                                                                                                                                                                           | 295          | 24   | -78  | -9  | 3.96        |      |      |     |    |   |
|                            | R Fusiform Gyrus                                                                                                                                                                                                                          |              |      |      |     |             |      |      |     |    |   |
|                            | R Middle Occipital Gyrus                                                                                                                                                                                                                  | 218          | 28   | -44  | -12 | 4.24        |      |      |     |    |   |
|                            | R Parahippocampal Gyrus                                                                                                                                                                                                                   |              |      |      |     |             |      |      |     |    |   |
|                            | R Fusiform Gyrus                                                                                                                                                                                                                          |              |      |      |     |             |      |      |     |    |   |
|                            | R Occipital Gyrus                                                                                                                                                                                                                         | 126          | -34  | -86  | 18  | 3.42        |      |      |     |    |   |
| L Middle Occipital Gyrus   |                                                                                                                                                                                                                                           |              |      |      |     |             |      |      |     |    |   |
| L Superior Occipital Gyrus |                                                                                                                                                                                                                                           |              |      |      |     |             |      |      |     |    |   |
| Decay (State 2)            | R Precuneus                                                                                                                                                                                                                               | 296          | 8    | -66  | 48  | 4.11        |      |      |     |    |   |
|                            | L Precuneus                                                                                                                                                                                                                               |              |      |      |     |             |      |      |     |    |   |
| Decay (State 3)            | Middle Occipital Gyrus<br>Middle Temporal Gyrus<br>Lingual Gyrus<br>Cuneus<br>L Superior Temporal Gyrus<br>Inferior Temporal Gyrus<br>Inferior Parietal Lobule<br>Inferior Occipital Gyrus<br>R Precuneus<br>R Fusiform Gyrus<br>L Insula | 5642         | 7.01 | 46   | -62 | 6           |      |      |     |    |   |
| Reward                     | Medial Frontal Gyrus<br>Anterior Cingulate<br>L Middle Frontal Gyrus<br>Superior Frontal Gyrus<br>L Inferior Frontal Gyrus<br>Ventral Striatum                                                                                            |              |      |      |     |             | 1855 | 5.24 | -14 | 56 | 9 |

|                     |                               |      |      |     |     |    |
|---------------------|-------------------------------|------|------|-----|-----|----|
|                     | Caudate Head                  |      |      |     |     |    |
|                     | Rectal Gyrus                  |      |      |     |     |    |
|                     | Subcallosal Gyrus             |      |      |     |     |    |
|                     | Cingulate Gyrus               |      |      |     |     |    |
|                     | Paracentral Lobule            |      |      |     |     |    |
|                     | Medial Frontal Gyrus          | 1785 | 5.04 | -10 | 12  | 27 |
|                     | Precentral Gyrus              |      |      |     |     |    |
|                     | Precuneus                     |      |      |     |     |    |
|                     | Postcentral Gyrus             |      |      |     |     |    |
|                     | R Superior Temporal Gyrus     |      |      |     |     |    |
|                     | R Inferior Parietal Lobule    |      |      |     |     |    |
|                     | R Precentral Gyrus            |      |      |     |     |    |
|                     | R Postcentral Gyrus           | 1408 | 5.55 | 58  | -36 | 15 |
|                     | R Insula                      |      |      |     |     |    |
|                     | R Transverse Temporal Gyrus   |      |      |     |     |    |
|                     | R Inferior Frontal Gyrus      |      |      |     |     |    |
|                     | L Precentral Gyrus            |      |      |     |     |    |
|                     | L Transverse Temporal Gyrus   |      |      |     |     |    |
|                     | L Postcentral Gyrus           | 239  | 4.55 | -44 | -24 | 9  |
|                     | L Superior Temporal Gyrus     |      |      |     |     |    |
|                     | L Insula                      |      |      |     |     |    |
|                     | R Dorsal Caudate White Matter | 176  | 4.87 | 22  | 10  | 30 |
|                     | R Precentral Gyrus            | 168  | 4.35 | 40  | -22 | 42 |
|                     | R Postcentral Gyrus           |      |      |     |     |    |
|                     | R Putamen                     | 132  | 4.39 | 32  | 0   | 3  |
|                     | R Insula                      |      |      |     |     |    |
|                     | R Medial Frontal Gyrus        |      |      |     |     |    |
|                     | R Middle Frontal Gyrus        | 118  | 4.45 | 16  | 54  | 3  |
|                     | R Superior Frontal Gyrus      |      |      |     |     |    |
|                     | L Caudate Tail                | 86   | 4.35 | -18 | -2  | 27 |
|                     | L Posterior Putamen           |      |      |     |     |    |
|                     | L Superior Temporal Gyrus     | 82   | 4.71 | -64 | -10 | 3  |
|                     | L Cingulate Gyrus             | 51   | 4.41 | -8  | -42 | 30 |
|                     | L Precuneus                   |      |      |     |     |    |
|                     | L Middle Temporal Gyrus       |      |      |     |     |    |
|                     | Posterior Cingulate           |      |      |     |     |    |
|                     | Cuneus                        |      |      |     |     |    |
| Reward (State rest) | Precuneus                     | 1953 | 4.53 | -20 | -74 | 27 |
|                     | L Middle Occipital Gyrus      |      |      |     |     |    |
|                     | Cingulate Gyrus               |      |      |     |     |    |
|                     | L Superior Occipital Gyrus    |      |      |     |     |    |
|                     | L Lingual Gyrus               |      |      |     |     |    |



|                            |      |      |     |     |     |
|----------------------------|------|------|-----|-----|-----|
| L Inferior Occipital Gyrus |      |      |     |     |     |
| L Parahippocampal Gyrus    |      |      |     |     |     |
| L Superior Temporal Gyrus  |      |      |     |     |     |
| Medial Frontal Gyrus       |      |      |     |     |     |
| Anterior Cingulate         |      |      |     |     |     |
| Ventral Striatum           | 1321 | 5.35 | 8   | 24  | 3   |
| Caudate Head               |      |      |     |     |     |
| Rectal Gyrus               |      |      |     |     |     |
| L Superior Frontal Gyrus   |      |      |     |     |     |
| R Middle Occipital Gyrus   |      |      |     |     |     |
| R Inferior Occipital Gyrus |      |      |     |     |     |
| R Cuneus                   |      |      |     |     |     |
| R Middle Temporal Gyrus    | 995  | 4.53 | 32  | -62 | 9   |
| R Inferior Temporal Gyrus  |      |      |     |     |     |
| R Posterior Cingulate      |      |      |     |     |     |
| R Lingual Gyrus            |      |      |     |     |     |
| L Cingulate Gyrus          | 458  | 4.76 | -22 | -26 | 36  |
| White Matter               |      |      |     |     |     |
| R Precentral Gyrus         | 333  | 4.25 | 30  | -38 | 72  |
| R Postcentral Gyrus        |      |      |     |     |     |
| R Hippocampus              | 250  | 4.93 | 32  | -34 | 0   |
| R Parahippocampal Gyrus    |      |      |     |     |     |
| L Parahippocampal Gyrus    |      |      |     |     |     |
| L Fusiform Gyrus           |      |      |     |     |     |
| L Hippocampus              | 250  | 3.88 | -38 | -52 | -12 |
| L Middle Occipital Gyrus   |      |      |     |     |     |
| L Middle Temporal Gyrus    |      |      |     |     |     |
| R Precentral Gyrus         |      |      |     |     |     |
| R Insula                   | 207  | 4.3  | 56  | 0   | 18  |
| R Postcentral Gyrus        |      |      |     |     |     |
| L Medial Frontal Gyrus     | 181  | 4    | -16 | 42  | 24  |
| L Superior Frontal Gyrus   |      |      |     |     |     |

**Supplementary Table 2.** Additional PFC region of interest state information analysis.

Regression results are shown for current state (state 1) and the future state (state 3) by correct repetition interaction. Results from the OFC-VMPFC are as shown in **Figure 3**.

Number of included participants per ROI for the future by repetition analysis depends on exclusions for below-zero classification of state 1 and state 3. antHipp = anterior hippocampus; postHipp = posterior hippocampus.

|  | region     | current<br>(n = 31) | CI                   | t-<br>stat  | p-<br>value   | n         | fut*rep      | CI                   | t-<br>stat  | p-<br>value   |
|--|------------|---------------------|----------------------|-------------|---------------|-----------|--------------|----------------------|-------------|---------------|
|  | <b>OFC</b> | <b>0.092</b>        | <b>0.05<br/>0.13</b> | <b>4.48</b> | <b>0.0001</b> | <b>29</b> | <b>0.051</b> | <b>0.01<br/>0.09</b> | <b>2.53</b> | <b>0.0172</b> |
|  | R antOFC   | -0.001              | -0.04 0.03           | -0.08       | 0.9384        | 22        | 0.011        | -0.05 0.07           | 0.37        | 0.7176        |
|  | L antOFC   | 0.014               | -0.03 0.05           | 0.70        | 0.4880        | 24        | 0.033        | -0.01 0.08           | 1.46        | 0.1570        |
|  | pgACC      | 0.022               | -0.01 0.06           | 1.27        | 0.2152        | 24        | 0.034        | -0.01 0.08           | 1.57        | 0.1311        |
|  | dmPFC      | 0.138               | 0.1 0.17             | 7.81        | 0.0000        | 30        | 0.017        | -0.02 0.05           | 0.90        | 0.3749        |
|  | fpPFC      | 0.097               | 0.06 0.13            | 5.63        | 0.0000        | 30        | 0.001        | -0.04 0.04           | 0.08        | 0.9371        |
|  | R latPFC a | 0.038               | 0 0.08               | 1.95        | 0.0610        | 25        | 0.002        | -0.05 0.05           | 0.08        | 0.9351        |
|  | L latPFC a | 0.021               | -0.01 0.06           | 1.22        | 0.2324        | 21        | -0.007       | -0.05 0.04           | -0.31       | 0.7588        |
|  | R latOFC   | 0.084               | 0.06 0.11            | 7.84        | 0.0000        | 29        | -0.004       | -0.03 0.02           | -0.30       | 0.7701        |
|  | L latOFC   | 0.038               | 0.01 0.07            | 2.57        | 0.0153        | 27        | -0.008       | -0.04 0.03           | -0.47       | 0.6439        |
|  | ACC a      | -0.007              | -0.04 0.03           | -0.42       | 0.6808        | 23        | 0.014        | -0.05 0.07           | 0.47        | 0.6401        |
|  | sgACC      | 0.017               | -0.01 0.05           | 1.13        | 0.2688        | 27        | 0.008        | -0.03 0.04           | 0.43        | 0.6739        |
|  | R latPFC b | 0.121               | 0.08 0.16            | 5.78        | 0.0000        | 28        | -0.007       | -0.04 0.03           | -0.38       | 0.7100        |
|  | L latPFC b | 0.093               | 0.04 0.14            | 3.90        | 0.0005        | 29        | -0.026       | -0.09 0.04           | -0.86       | 0.3952        |
|  | R infPFC   | 0.052               | 0 0.1                | 2.16        | 0.0393        | 29        | -0.003       | -0.06 0.06           | -0.11       | 0.9134        |
|  | L infPFC   | 0.061               | 0.01 0.11            | 2.57        | 0.0153        | 28        | 0.052        | -0.02 0.12           | 1.45        | 0.1573        |
|  | ACC b      | 0.020               | -0.02 0.06           | 0.98        | 0.3357        | 29        | -0.018       | -0.07 0.03           | -0.76       | 0.4509        |
|  | ACC c      | 0.020               | -0.04 0.08           | 0.70        | 0.4889        | 25        | 0.008        | -0.05 0.07           | 0.27        | 0.7931        |
|  | R DLPFC a  | 0.050               | 0 0.1                | 2.04        | 0.0507        | 27        | 0.050        | -0.01 0.11           | 1.79        | 0.0858        |
|  | L DLPFC a  | 0.025               | -0.01 0.06           | 1.50        | 0.1451        | 25        | 0.027        | -0.06 0.11           | 0.67        | 0.5115        |
|  | R DLPFC b  | 0.027               | 0 0.06               | 1.88        | 0.0694        | 24        | 0.035        | -0.01 0.08           | 1.58        | 0.1278        |
|  | L DLPFC b  | 0.051               | 0.02 0.08            | 3.33        | 0.0023        | <b>24</b> | <b>0.047</b> | <b>0.02 0.08</b>     | <b>3.10</b> | <b>0.0051</b> |
|  | R DLPFC c  | -0.021              | -0.07 0.02           | -1.00       | 0.3232        | 26        | 0.025        | -0.04 0.09           | 0.79        | 0.4377        |
|  | L DLPFC c  | 0.076               | 0.02 0.13            | 2.66        | 0.0125        | 21        | 0.041        | -0.03 0.11           | 1.28        | 0.2164        |
|  | R DLPFC d  | 0.056               | -0.02 0.13           | 1.59        | 0.1220        | 25        | -0.030       | -0.13 0.07           | -0.64       | 0.5267        |
|  | L DLPFC d  | 0.062               | 0.01 0.11            | 2.62        | 0.0136        | 27        | 0.070        | -0.01 0.15           | 1.87        | 0.0725        |

|            |        |            |       |        |    |        |            |       |        |
|------------|--------|------------|-------|--------|----|--------|------------|-------|--------|
| R antHipp  | 0.031  | 0.00 0.06  | 2.40  | 0.0228 | 30 | 0.001  | -0.03 0.03 | 0.08  | 0.9370 |
| L antHipp  | 0.012  | -0.04 0.07 | 0.45  | 0.6553 | 26 | -0.001 | -0.06 0.05 | -0.06 | 0.9564 |
| R postHipp | 0.038  | -0.00 0.08 | 1.87  | 0.0717 | 27 | -0.026 | -0.09 0.04 | -0.84 | 0.4091 |
| L postHipp | -0.013 | -0.06 0.04 | -0.55 | 0.5842 | 18 | -0.012 | -0.07 0.05 | -0.43 | 0.6745 |

**Supplementary Table 3.** Summary of OFC-VMPFC Late > Early repetition PPI analysis effects correlated with the OFC-VMPFC future state by correct repetition effect. State 1 was the timepoint of interest; later states were analyzed in control models. The PPI contrast of late versus early repetitions (3 and 4 versus 1 and 2) or the reverse was regressed against individual differences in the OFC-VMPFC future state by correct repetition regression coefficient (as depicted in **Figure 3b**). No main effects of the contrasts of late > early repetitions or early > late repetitions were found. Clusters of activity exceed whole-brain  $p < 0.05$  FWE-corrected (cluster-forming threshold  $p < 0.005$ ). Within each cluster, the first 10 regions are listed that include  $\geq 10$  voxels in a cluster.

| Contrast                                             | Regions                       | Cluster size | x   | y   | z  | Peak z stat | P-value |
|------------------------------------------------------|-------------------------------|--------------|-----|-----|----|-------------|---------|
| State 1<br>OFC PPI<br>Late > Early<br>future*repcorr | Bilat. Middle Frontal Gyrus   | 5712         | 42  | 12  | 39 | 4.93        | 0       |
|                                                      | Bilat. Inferior Frontal Gyrus |              |     |     |    |             |         |
|                                                      | Bilat. Superior Frontal Gyrus |              |     |     |    |             |         |
|                                                      | Medial Frontal Gyrus          |              |     |     |    |             |         |
|                                                      | Cingulate Gyrus               |              |     |     |    |             |         |
|                                                      | Precentral Gyrus              |              |     |     |    |             |         |
|                                                      | L Putamen                     |              |     |     |    |             |         |
|                                                      | Anterior Insula               |              |     |     |    |             |         |
|                                                      | L Caudate Body                |              |     |     |    |             |         |
|                                                      | R Putamen                     |              |     |     |    |             |         |
| State 1<br>OFC PPI<br>Early > Late<br>future*repcorr | R Pallidum                    | 275          | 24  | -2  | 0  | 4.54        | 0.006   |
|                                                      | R Insula                      | 285          | -6  | -10 | -9 | 4.47        | 0.005   |
|                                                      | R Amygdala                    |              |     |     |    |             |         |
| Midbrain                                             |                               |              |     |     |    |             |         |
| State 1<br>OFC PPI<br>Late > Early<br>future*repcorr | Thalamus                      | 282          | -50 | -20 | 24 | 3.99        | 0.005   |
|                                                      | R Hippocampus                 |              |     |     |    |             |         |
|                                                      | L Postcentral Gyrus           |              |     |     |    |             |         |
|                                                      | L Supramarginal Gyrus         |              |     |     |    |             |         |
| State 1<br>OFC PPI<br>Early > Late<br>future*repcorr | L Inferior Parietal Lobule    | 282          | -50 | -20 | 24 | 3.99        | 0.005   |
|                                                      | L Inferior Parietal Lobule    |              |     |     |    |             |         |
| State 1<br>OFC PPI<br>Early > Late<br>future*repcorr | -                             |              |     |     |    |             |         |

|                                                           |   |
|-----------------------------------------------------------|---|
| State 2<br>OFC PPI<br>Late > Early<br>future*repcorr      | - |
| State 2<br>OFC PPI<br>Early > Late<br>future*repcorr      | - |
| State 3<br>OFC PPI<br>Late > Early<br>future*repcorr      | - |
| State 3<br>OFC PPI<br>Early > Late<br>future*repcorr      | - |
| State reward<br>OFC PPI<br>Late > Early<br>future*repcorr | - |
| State reward<br>OFC PPI<br>Early > Late<br>future*repcorr | - |
